# Supplementary material
Source: PubMed Central journal article supplement (PMC7876729)
Supplement: TBSD_A_1866669_SM7847.pdf [file TBSD_A_1866669_SM7847.pdf]

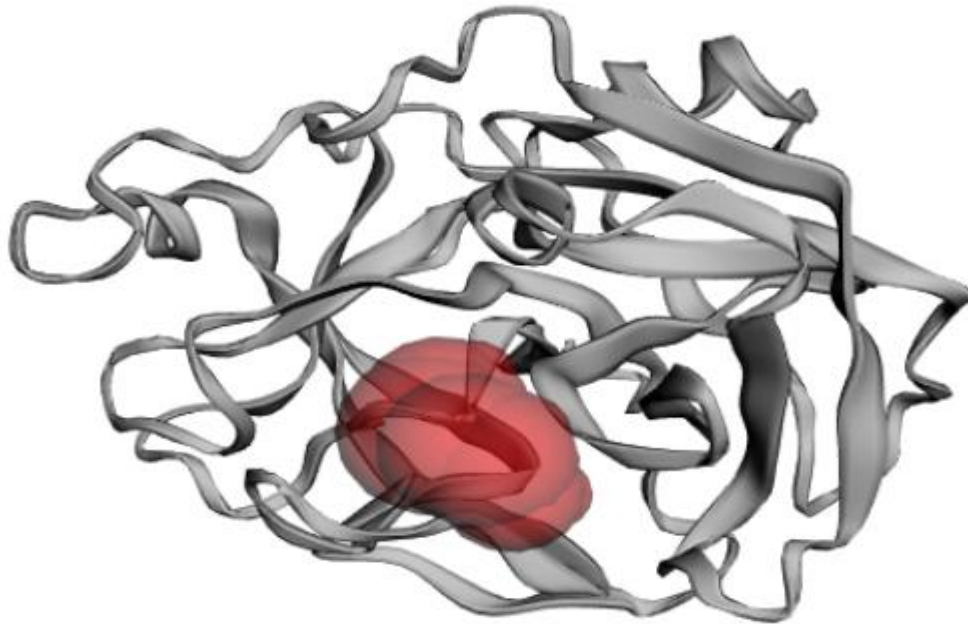

```

I V G G I E V E E G E W P W O A S L Q W D G S H R C G A I L I N A I W L V S A A H C F I I Y W I A S E V I I K P S K M K R G L R R
I I V H E K Y K H P S H D Y D I S L A E L S S P V P Y I N A V H R V C L P D A S Y E E Q P G D V M E V I G E G A L K N D G Y S Q N
H L R Q A Q V I L I D A T I C N Q A Y N D A I I P R M L C A L E F G K I D A C Q G D S G G P L V S S D A D I W Y L A G I V S W G D E
C A K P N K P G V Y I R V I A L R D W I T S K T G I

```

**3D Cartoon structure of TMPRSS2 protein. The active sites highlighted as boxes**

**Supplementary File 1**
